# Supplementary material for: Total organic carbon (TOC): a simple tool for assessing micro(nano)plastics and nanocellulose recovery during size-based fractionation
Source: Springer Nature journal article supplement (doi:10.1007/s00216-025-05812-4), 2025-05-19
Supplement: MOESM1 [file 216_2025_5812_MOESM1_ESM.pdf]

## Total Organic Carbon (TOC): a simple tool for assessing micro(nano)plastics and nanocellulose recovery during size-based fractionation

Guillaume Bucher<sup>1</sup>, Gabriella F. Schirinzi<sup>1</sup>, Chiara Verra<sup>1</sup>, Hind El Hadri<sup>1</sup>, Otmar Geiss<sup>1</sup>, Douglas Gilliland<sup>\*1</sup>

<sup>1</sup>European Commission, Joint Research Centre (JRC), Ispra, Italy

\*Corresponding Author

### Supplementary Information

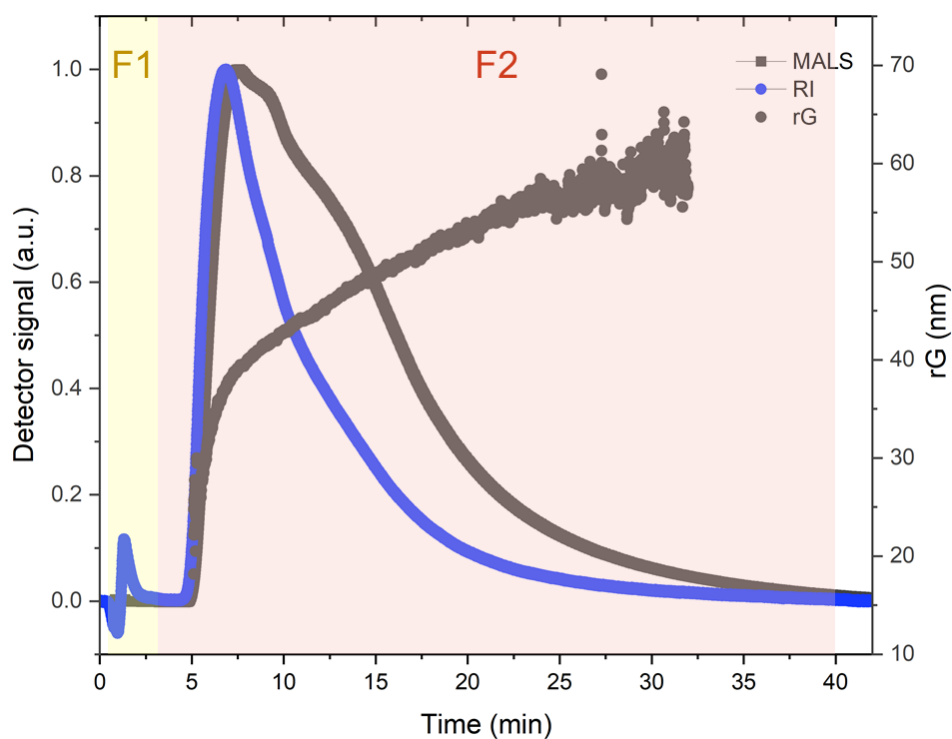

**Fig. S1** Typical fractogram of a crystalline nanocellulose sample during AF4 fractionation with MALS, rG and RI signals. The collection times of fractions F1 and F2 are shown in the background in yellow and orange, respectively.

**Table S2.** pH, total inorganic carbon (TIC) and concentrations of 39 elements in environmental surface water samples collected from Lake Maggiore (Ispra, Italy, Coordinates 45°48'23.8"N - 8°36'23.7"E) and the Variola River (Monte Ossolano, Italy, Coordinates 46°07'31.2"N - 8°13'29.3"E).

| Element Concentrations<br>( $\mu\text{g L}^{-1}$ ) | Lake Maggiore               | Variola River               |
|----------------------------------------------------|-----------------------------|-----------------------------|
|                                                    | pH 7.84                     | pH 8.03                     |
|                                                    | TIC 10.3 mg L <sup>-1</sup> | TIC 14.6 mg L <sup>-1</sup> |
| Li                                                 | 0.909                       | <LOD (0.6)                  |
| Be                                                 | <LOD (0.4)                  | <LOD (0.4)                  |
| B                                                  | 2.8                         | <LOD (0.7)                  |
| Na                                                 | 2735                        | 798                         |
| Mg                                                 | 3373                        | 6576                        |
| Al                                                 | 5.93                        | 4.22                        |
| Si                                                 | 3718                        | 6861                        |
| Cl                                                 | 3542                        | 896                         |
| K                                                  | 1445                        | 409                         |
| Ca                                                 | 13721                       | 12984                       |
| Sc                                                 | 0.010                       | <LOD (0.007)                |
| Ti                                                 | 0.125                       | <LOD (0.1)                  |
| V                                                  | 0.150                       | 0.184                       |
| Cr                                                 | 0.079                       | 1.691                       |
| Mn                                                 | 0.876                       | 0.099                       |
| Fe                                                 | 5.065                       | 0.590                       |
| Co                                                 | 0.016                       | 0.012                       |
| Ni                                                 | 0.739                       | 3.396                       |
| Cu                                                 | 0.766                       | 0.574                       |
| Zn                                                 | <LOD (0.014)                | 0.103                       |
| As                                                 | 1.283                       | 0.222                       |
| Se                                                 | 0.206                       | 0.247                       |
| Rb                                                 | 2.057                       | 0.562                       |
| Sr                                                 | 200                         | 181                         |
| Y                                                  | 0.017                       | 0.006                       |
| Zr                                                 | 0.006                       | 0.005                       |
| Mo                                                 | 1.082                       | 2.467                       |
| Ru                                                 | <LOD (0.004)                | <LOD (0.004)                |
| Rh                                                 | <LOD (0.001)                | <LOD (0.001)                |
| Pd                                                 | 0.017                       | 0.020                       |
| Ag                                                 | 0.002                       | <LOD (0.001)                |
| Cd                                                 | <LOD (0.011)                | 0.016                       |
| In                                                 | <LOD (0.002)                | <LOD (0.002)                |
| Sn                                                 | 0.015                       | 0.040                       |
| Ba                                                 | 12.4                        | 3.9                         |
| Eu                                                 | <LOD (0.001)                | <LOD (0.001)                |
| Au                                                 | 0.015                       | 0.015                       |
| Pb                                                 | 0.018                       | 0.089                       |
| Bi                                                 | <LOD (0.001)                | <LOD (0.001)                |

**Table S3.** AF4 parameters for nanocellulose fractionation

| AF4 parameters        |                                                                                                                                                     |
|-----------------------|-----------------------------------------------------------------------------------------------------------------------------------------------------|
| <b>Membrane</b>       | Regenerated cellulose 10 kDa                                                                                                                        |
| <b>Channel</b>        | Short channel with 350 $\mu\text{m}$ spacer                                                                                                         |
| <b>Temperature</b>    | $25.0 \pm 0.1$ °C (channel and detectors)                                                                                                           |
| <b>Eluent</b>         | 1 mM NaCl                                                                                                                                           |
| <b>Detector flow</b>  | $0.5 \text{ mL min}^{-1}$                                                                                                                           |
| <b>Cross flow</b>     | $0.8 \text{ mL min}^{-1}$                                                                                                                           |
| <b>Focus flow</b>     | $2 \text{ mL min}^{-1}$                                                                                                                             |
| <b>Elution method</b> | 2 min elution + cross flow<br>2 min focus<br>3 min focus + injection<br>3 min focus<br>60 min elution + cross flow<br>5 min elution (no cross flow) |

**Table S4a.** Expected and TOC-derived solid content for different PS micro- and nano-particle standards

| Sample Name         | Particle characteristics  |              | TOC measurement procedure | Solid Content (%wt) |                       |                 |                                   |
|---------------------|---------------------------|--------------|---------------------------|---------------------|-----------------------|-----------------|-----------------------------------|
|                     | Nominal Size (nm)         | Polymer Type |                           | Expected            | Source                | Measured by TOC | Recovery (%) as Measured/Expected |
| PS 50 nm            | 50                        | PS           | Standard                  | 2.6%                | CoA                   | 2.4%            | $92.6\% \pm 0.7\%$                |
| PS 100 nm           | 100                       | PS           | Standard                  | 2.6%                | CoA                   | 2.7%            | $104.8\% \pm 0.3\%$               |
| PS 200 nm SA        | 200                       | PS           | Standard                  | 2.2%                | Measured <sup>a</sup> | 2.6%            | $118.0\% \pm 1.1\%$               |
| PS 200 nm Poly      | 200                       | PS           | Standard                  | 2.6%                | CoA                   | 2.7%            | $104.9\% \pm 0.2\%$               |
| PS 200 nm Fluo      | 200                       | PS           | Standard                  | 2.6%                | CoA                   | 2.6%            | $101.2\% \pm 0.3\%$               |
| PS 500 nm           | 500                       | PS           | Standard                  | 2.7%                | CoA                   | 2.6%            | $98.1\% \pm 0.3\%$                |
| PS 750 nm           | 750                       | PS           | Standard                  | 2.7%                | CoA                   | 2.7%            | $100.0\% \pm 0.7\%$               |
| PS 1 $\mu\text{m}$  | 1000 (1 $\mu\text{m}$ )   | PS           | Standard                  | 2.6%                | CoA                   | 2.6%            | $100.7\% \pm 1.5\%$               |
| PS 8 $\mu\text{m}$  | 8000 (8 $\mu\text{m}$ )   | PS           | Standard                  | 15.8%               | Measured <sup>a</sup> | 13.9%           | $87.9\% \pm 0.3\%$                |
| PS 10 $\mu\text{m}$ | 10000 (10 $\mu\text{m}$ ) | PS           | Standard                  | 2.3%                | Measured <sup>a</sup> | 2.0%            | $85.4\% \pm 0.8\%$                |
|                     |                           |              | Modified                  |                     |                       | 1.8%            | $79.2\% \pm 1.4\%$                |
| PS 30 $\mu\text{m}$ | 30000 (30 $\mu\text{m}$ ) | PS           | Standard                  | 10.0%               | Measured <sup>a</sup> | 7.4%            | $73.4\% \pm 3.7\%$                |
|                     |                           |              | Modified                  |                     |                       | 11.4%           | $113.6\% \pm 27.7\%$              |
| PS 45 $\mu\text{m}$ | 45000 (45 $\mu\text{m}$ ) | PS           | Standard                  | 2.7%                | CoA                   | 1.6%            | $60.4\% \pm 10.4\%$               |
|                     |                           |              | Modified                  |                     |                       | 2.9%            | $107.2\% \pm 5.3\%$               |
| PS 90 $\mu\text{m}$ | 90000 (90 $\mu\text{m}$ ) | PS           | Standard                  | 2.5%                | CoA                   | 0.14%           | $5.6\% \pm 0.03\%$                |
|                     |                           |              | Modified                  |                     |                       | 2.8%            | $111.6\% \pm 15.9\%$              |

<sup>a</sup>solid content measured in-house as = dry weight of particle residue (drying overnight at 40°C) / wet weight of particle suspension (50  $\mu\text{L}$  of suspension)

**Table S4b.** Expected and TOC-derived solid content for different types of micro- and nano-particles

|             | Particle characteristics                      |                                     | %Carbon in the polymer | TOC measurement procedure | Solid Content (%wt) |                       |                 |                                   |
|-------------|-----------------------------------------------|-------------------------------------|------------------------|---------------------------|---------------------|-----------------------|-----------------|-----------------------------------|
| Sample Name | Size (nm)                                     | Polymer Type                        |                        |                           | Expected            | Source                | Measured by TOC | Recovery (%) as Measured/Expected |
| Au-PE       | ≈ 120<br>( $\rho = 0.967 \text{ g cm}^{-3}$ ) | PE                                  | 85.63%                 | Standard                  | 0.19%               | Measured <sup>a</sup> | 0.18%           | 93.8% ± 1.0%                      |
| Au-PP       | ≈ 120<br>( $\rho = 0.962 \text{ g cm}^{-3}$ ) | PP                                  | 85.63%                 | Standard                  | 0.24%               | Measured <sup>a</sup> | 0.22%           | 89.7% ± 0.8%                      |
| Au-PVC      | ≈ 120<br>( $\rho = 1.435 \text{ g cm}^{-3}$ ) | PVC                                 | 38.44%                 | Standard                  | 0.22%               | Measured <sup>a</sup> | 0.28%           | 126.2% ± 0.6%                     |
| CNC 1       | ≈ 7 (diameter)<br>≈ 208 (length)              | crystalline nanocellulose           | 44.45%                 | Standard                  | 10.6%               | CoA                   | 10.21%          | 96.3% ± 0.9%                      |
| CNC 2       | ≈ 6 (diameter)<br>≈ 169 (length)              | crystalline nanocellulose           | 44.45%                 | Standard                  | 6.0%                | CoA                   | 6.07%           | 101.2% ± 1.0%                     |
| CNC 3       | ≈ 5 (diameter)<br>≈ 220 (length)              | crystalline nanocellulose           | 44.45%                 | Standard                  | 6.0%                | CoA                   | 5.91%           | 98.5% ± 1.0%                      |
| NFC 1       | ≈ 7 (diameter)<br>≈ 188 (length)              | TEMPO-oxidized cellulose nanofibers | 40.92%                 | Standard                  | 1.0%                | CoA                   | 1.024%          | 102.4% ± 1.0%                     |
| PET         | < 5000<br>( $\rho = 1.4 \text{ g cm}^{-3}$ )  | PET                                 | 62.50%                 | Standard                  | 0.0025%             | Measured <sup>a</sup> | 0.0021%         | 86.2% ± 2.9%                      |

<sup>a</sup>solid content measured in-house as = (dry weight of particle residue (drying overnight at 40°C) / wet weight of particle suspension (50 µL of suspension)) – contribution from Au to the mass of particles

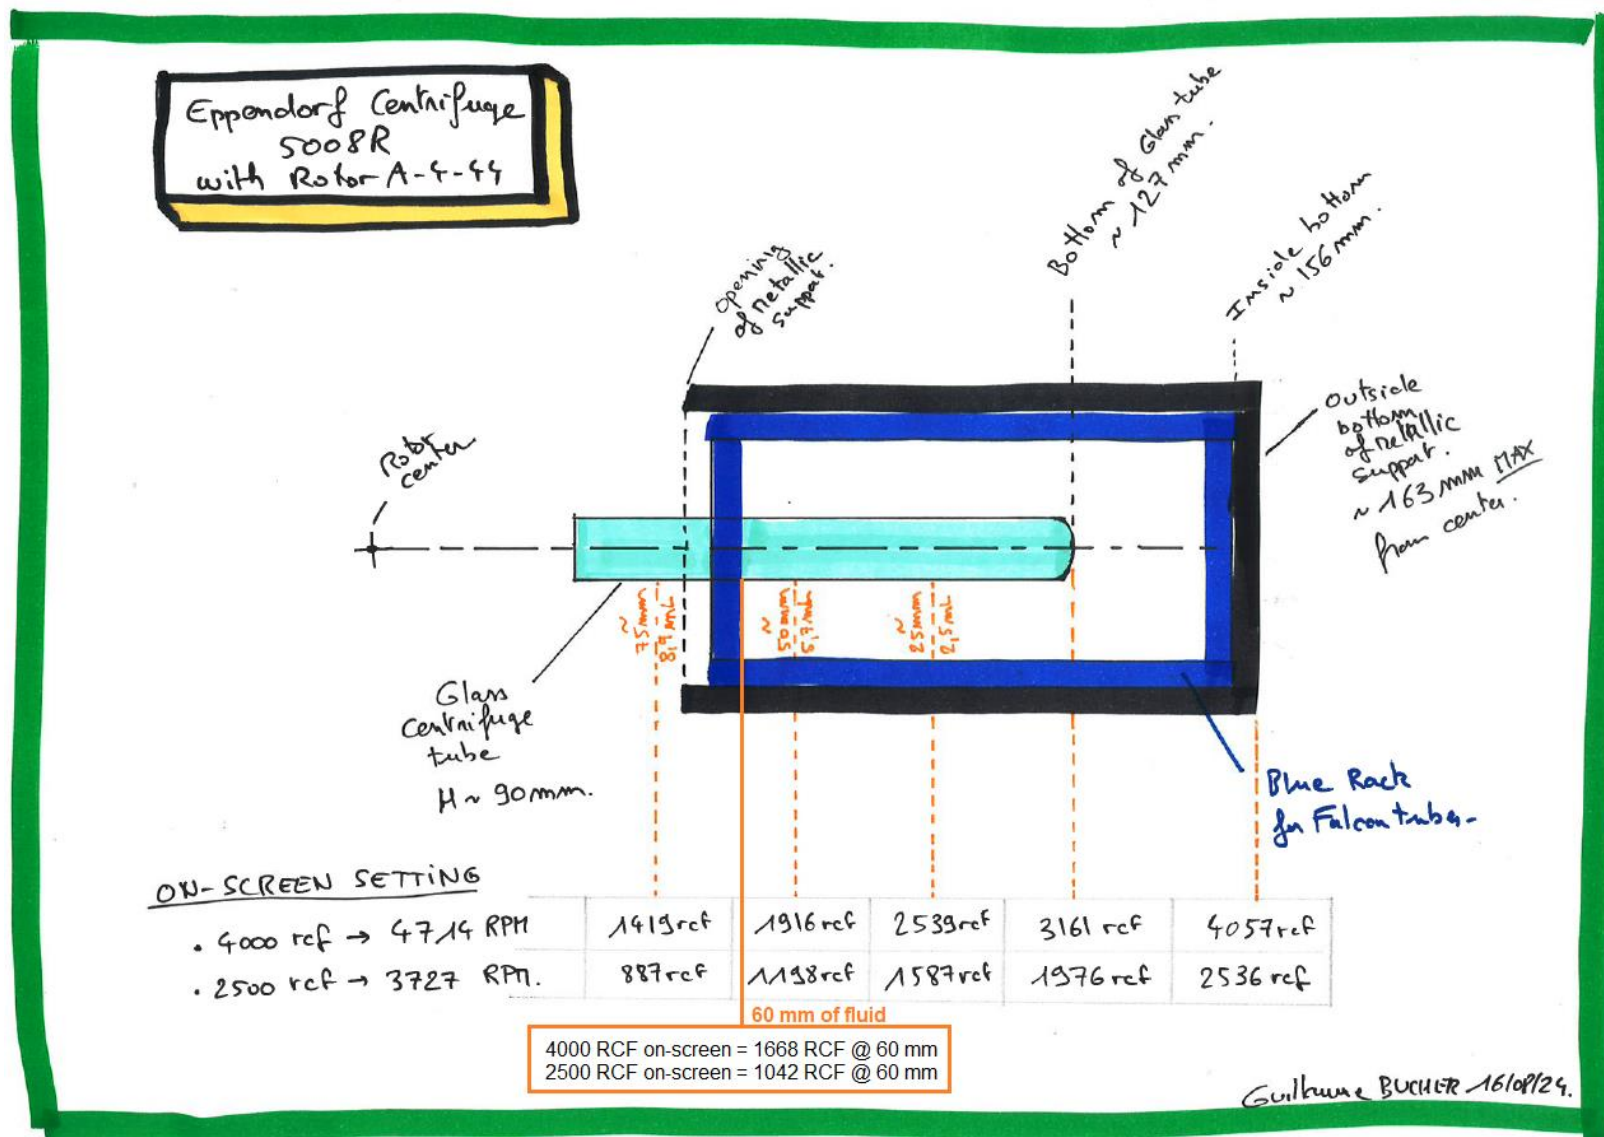

**Fig. S2** Diagram (top view) of the A-4-44 rotor to scale, showing the position of the tube containing the sample. The table at the bottom indicates the actual g-force (expressed in RCF) experienced by the sample at various position with a focus at 60 mm when setting 2500 RCF or 4000 RCF on the centrifuge screen.

**Table S5.** Expected and measured cellulose concentrations in stock suspensions before and after filtration with 0.45  $\mu$ m PVDF syringe filters.

| Material                                                  | CNC 1            | CNC 2           | CNC 3           | NFC 1            |
|-----------------------------------------------------------|------------------|-----------------|-----------------|------------------|
| Cellulose concentration from CoA (% wt)                   | 10.60            | 6.00            | 6.00            | 1.00             |
| Cellulose concentration from TOC before filtration (% wt) | 10.21 $\pm$ 0.10 | 6.07 $\pm$ 0.06 | 5.91 $\pm$ 0.06 | 1.024 $\pm$ 0.01 |
| Recovery as ratio of TOC vs. CoA (%)                      | 96.3 $\pm$ 0.9   | 101.2 $\pm$ 1.0 | 98.5 $\pm$ 1.0  | 102.4 $\pm$ 1.0  |
| Cellulose concentration from TOC after filtration (% wt)  | 10.16 $\pm$ 0.10 | 6.15 $\pm$ 0.06 | 5.90 $\pm$ 0.06 | 1.015 $\pm$ 0.01 |
| Recovery after filtration 0.45 $\mu$ m PVDF (%)           | 99.5 $\pm$ 2.0   | 101.4 $\pm$ 2.0 | 99.7 $\pm$ 2.0  | 99.0 $\pm$ 2.0   |
